# Supplementary material for: Venetoclax Decreases the Expression of the Spike Protein through Amino Acids Q493 and S494 in SARS-CoV-2
Source: MDPI journal article supplement (doi:10.3390/cells11121924), 2022-06-14

# **Venetoclax Decreases the Expression of the Spike Protein through Amino Acids Q493 and S494 in SARS-CoV-2**

**Chih-Chieh Chen<sup>1,2</sup>, Zhi-Jie Zhuang<sup>1</sup>, Chia-Wei Wu<sup>3</sup>, Yi-Ling Tan<sup>1</sup>, Chen Hsiu Huang<sup>3</sup>, Chia-Yi Hsu<sup>4</sup>, Eing-Mei Tsai<sup>4,5</sup> and Tsung-Hua Hsieh<sup>3\*</sup>**

**Table S1.** Ranking lists of the five times drug screening.

| No. | DrugBank ID | Drug name              | Structure                                                                           | Rank list 1 | Rank list 2 | Rank list 3 | Rank list 4 | Rank list 5 | Average ranking | Clinical indication                   |
|-----|-------------|------------------------|-------------------------------------------------------------------------------------|-------------|-------------|-------------|-------------|-------------|-----------------|---------------------------------------|
| 1   | DB11581     | Venetoclax             | 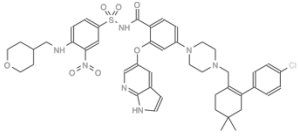   | 9           | 1           | 1           | 1           | 1           | 2.6             | Anti-cancer                           |
| 2   | DB09050     | Ceftolozane            |    | 1           | 7           | 2           | 2           | 2           | 2.8             | Anti-bacterial effect                 |
| 3   | DB09158     | Trypan blue free acid  |    | 4           | 5           | 4           | 5           | 8           | 5.2             | Vitrectomy therapy                    |
| 4   | DB00796     | Candesartan cilexetil  |    | 2           | 17          | 7           | 14          | 3           | 8.6             | Anti-hypertensive                     |
| 5   | DB01072     | Atazanavir             |   | 3           | 20          | 21          | 3           | 6           | 10.6            | Antiretroviral therapy                |
| 6   | DB01204     | Mitoxantrone           |  | 15          | 27          | 5           | 8           | 4           | 11.8            | Anti-cancer                           |
| 7   | DB06705     | Gadofosveset trisodium |  | 10          | 10          | 19          | 4           | 24          | 13.4            | Evaluate aortoiliac occlusive disease |
| 8   | DB09079     | Nintedanib             |  | 17          | 28          | 11          | 10          | 13          | 15.8            | Anti-cancer                           |
| 9   | DB08889     | Carfilzomib            |  | 22          | 19          | 8           | 25          | 20          | 18.8            | Anti-cancer                           |
| 10  | DB01082     | Streptomycin           |  | 13          | 18          | 14          | 22          | 42          | 21.8            | Anti-bacterial effect                 |
| 11  | DB11613     | Velpatasvir            |  | 78          | 2           | 16          | 16          | 7           | 23.8            | Anti-HCV                              |

|    |         |                        |                                                                                     |    |    |    |    |    |      |                                   |
|----|---------|------------------------|-------------------------------------------------------------------------------------|----|----|----|----|----|------|-----------------------------------|
| 12 | DB01601 | Lopinavir              | 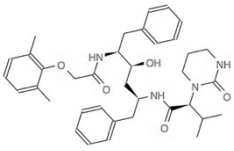   | 24 | 30 | 33 | 7  | 33 | 25.4 | Antiretroviral protease inhibitor |
| 13 | DB08822 | Azilsartan medoxomil   |    | 16 | 9  | 15 | 80 | 11 | 26.2 | Anti-hypertensive                 |
| 14 | DB01421 | Paromomycin            |    | 35 | 13 | 9  | 23 | 53 | 26.6 | Anti-bacterial effect             |
| 15 | DB11602 | Hydroxyethyl cellulose |    | 21 | 12 | 41 | 56 | 14 | 28.8 | Artificial tear solutions         |
| 16 | DB09297 | Paritaprevir           |   | 30 | 57 | 25 | 15 | 18 | 29   | Anti-HCV                          |
| 17 | DB00460 | Verteporfin            |  | 11 | 38 | 45 | 31 | 27 | 30.4 | Photodynamic therapy              |
| 18 | DB01232 | Saquinavir             |  | 8  | 76 | 31 | 35 | 9  | 31.8 | Anti-HIV                          |
| 19 | DB00385 | Valrubicin             |  | 18 | 14 | 13 | 74 | 50 | 33.8 | Anti-bladder carcinoma            |
| 20 | DB00284 | Acarbose               |  | 39 | 4  | 77 | 9  | 47 | 35.2 | Type 2 diabetes mellitus therapy  |

---

Full-length gels and blots for2D

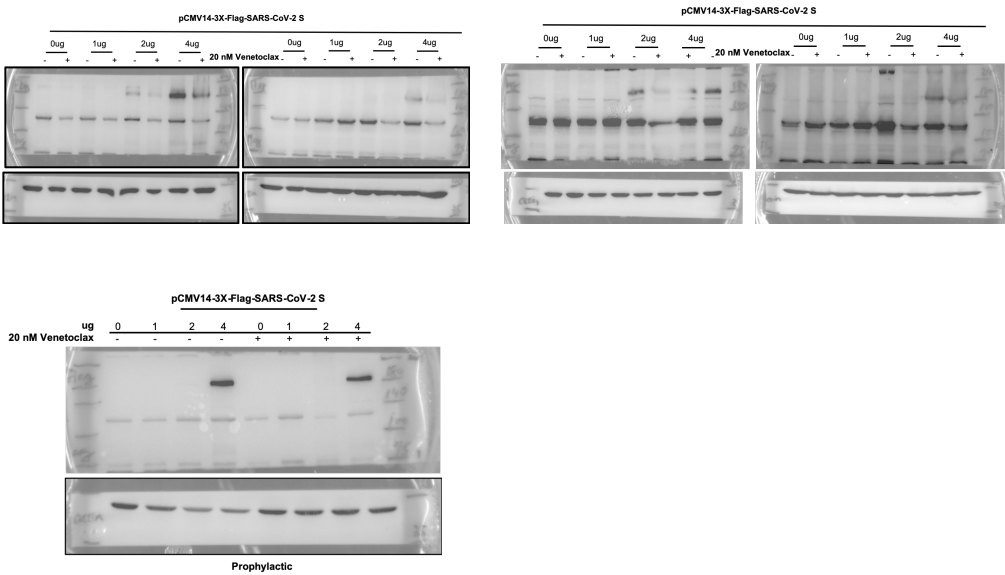

Full-length gels and blots for 2E

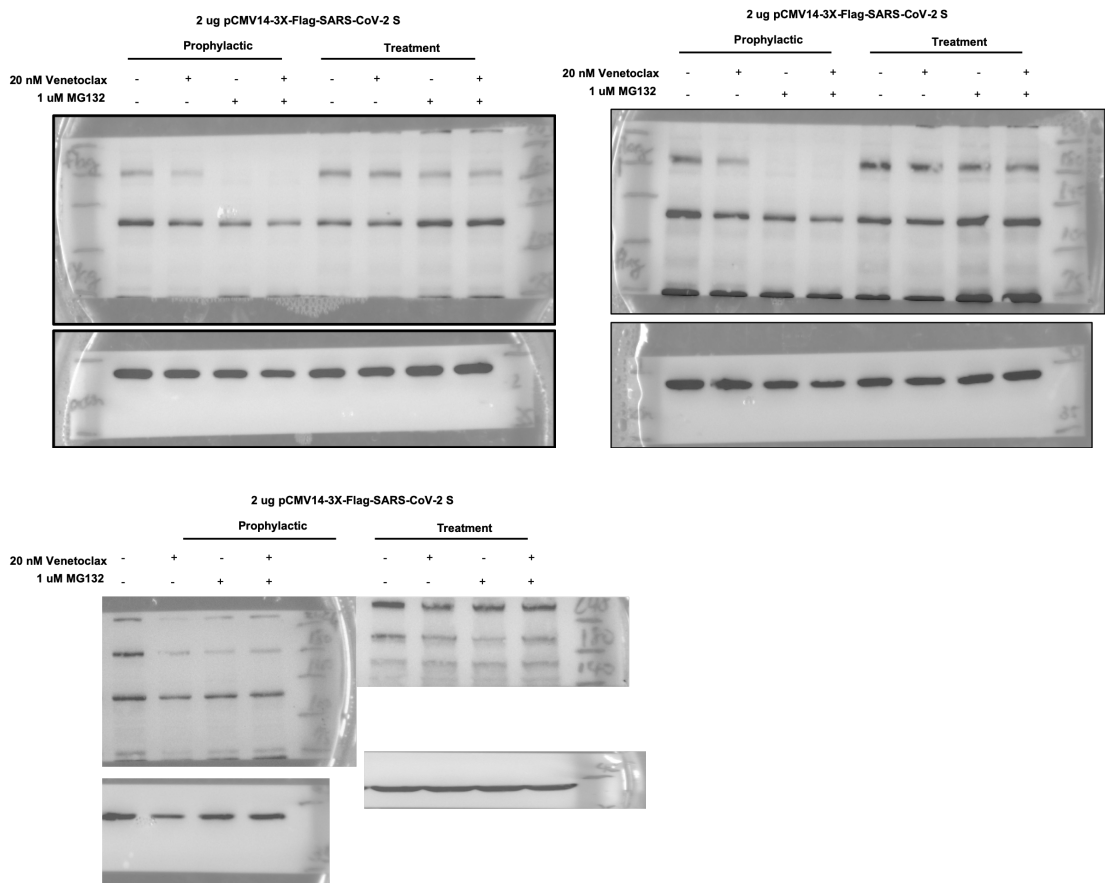



Full-length gels and blots for 3E

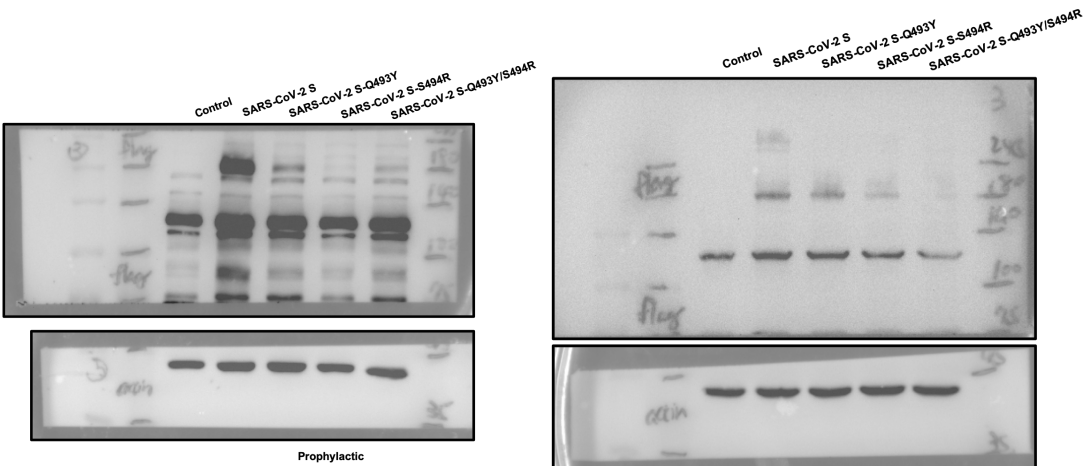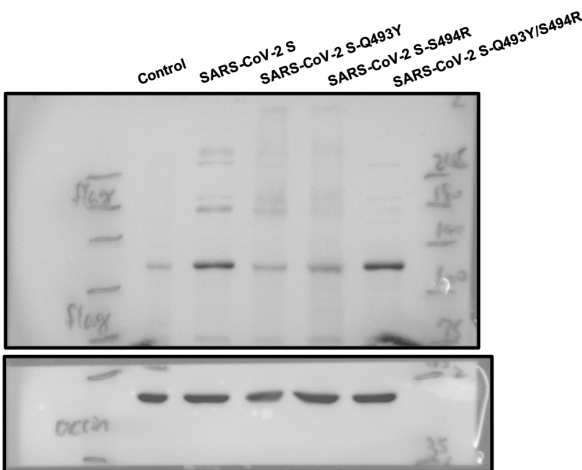

Full-length gels and blots for 3F

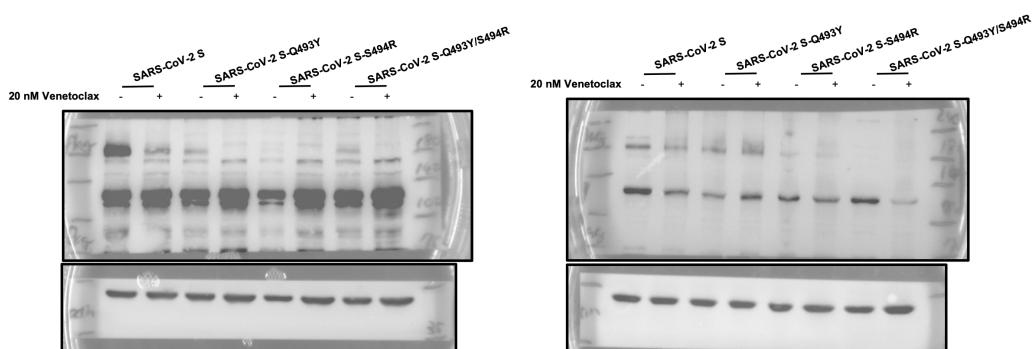

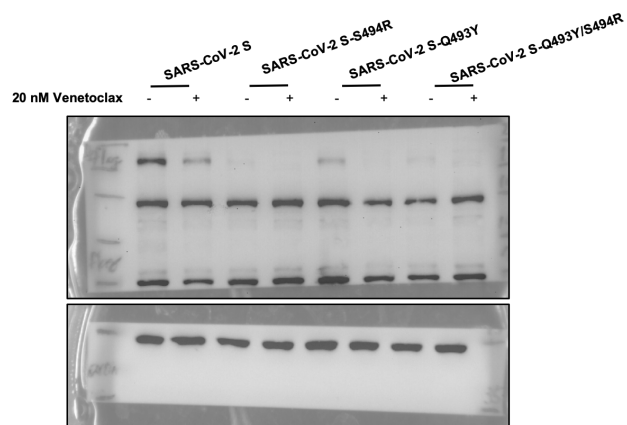

## Full-length gels and blots for 3G

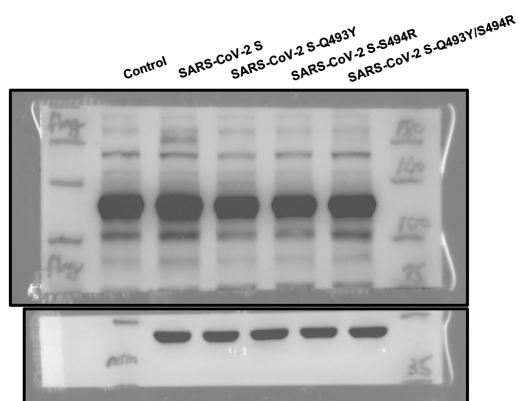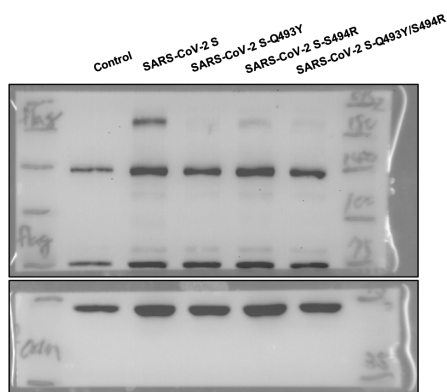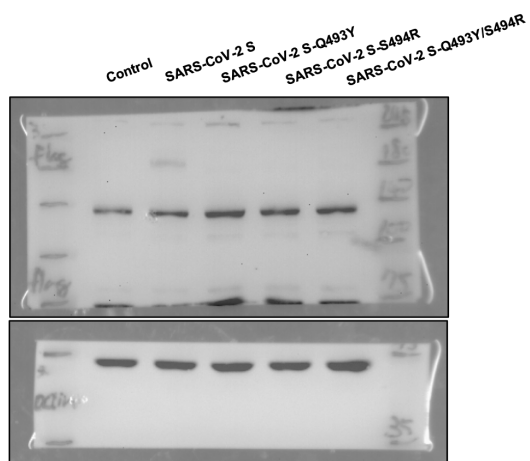

Full-length gels and blots for 3H

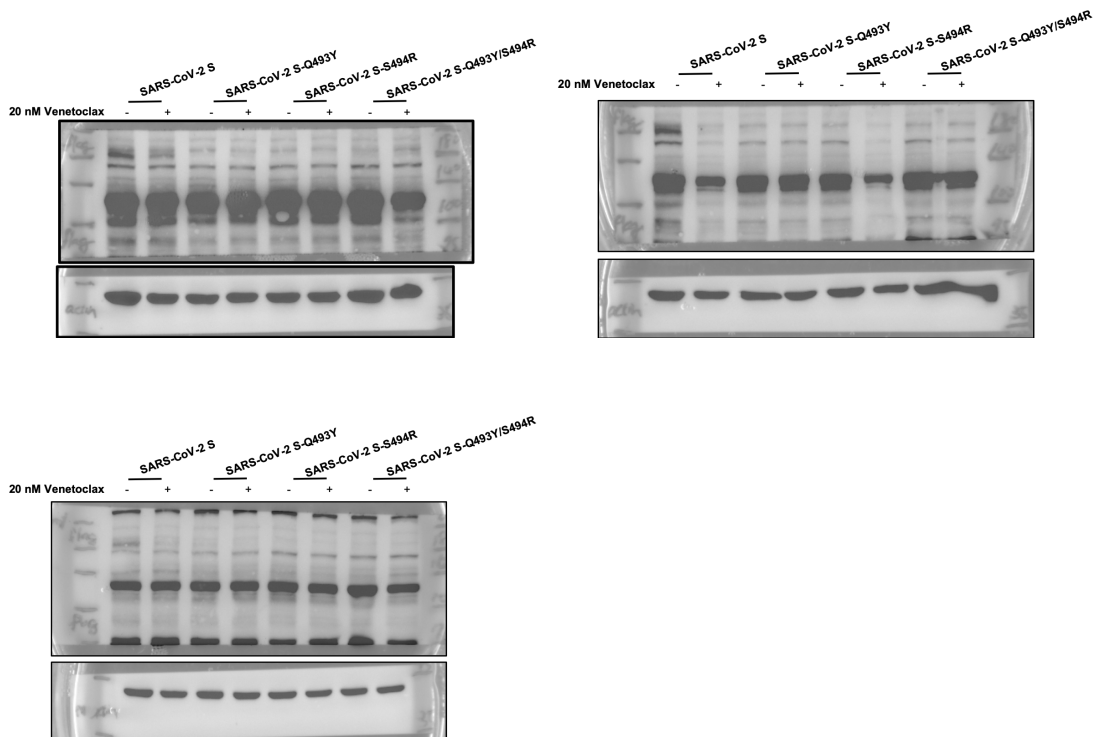

Supplement: s1 [file s1]
